# Supplementary material for: Composite fiber as a multifunctional catalyst support for the upgradation of lignin-based chemicals
Source: Royal Society of Chemistry journal article supplement (doi:10.1039/d3gc04579j), 2024-01-01
Supplement: d3gc04579j1.pdf [file d3gc04579j1.pdf]

## Supporting Information

### Composite Fibers as a Multifunctional Catalyst Support for the Upgradation of Lignin-based Chemicals

Zuzhi Li<sup>a,b</sup>, Ya Ma<sup>a,b</sup>, Xingjie Guo<sup>a,b</sup>, Yang Cao<sup>c</sup>, Qian Jiang<sup>a,b</sup>, Mi Gao<sup>a,b</sup>, Xudong Liu<sup>d</sup>, Daniel CW Tsang<sup>c,\*</sup>, Zhicheng Jiang<sup>a,b,\*</sup>, Bi Shi<sup>a,b</sup>

<sup>a</sup> College of Biomass Science and Engineering, Sichuan University, Chengdu 610065, China

<sup>b</sup> National Engineering Research Center of Clean Technology in Leather Industry, Sichuan University, Chengdu 610065, China

<sup>c</sup> Department of Civil and Environmental Engineering, The Hong Kong University of Science and Technology, Clear Water Bay, Hong Kong, China

<sup>d</sup> State Key Laboratory of Utilization of Woody Oil Resource, Hunan Academy of Forestry, Changsha, China

**Table S1.** Molecular weight of tannin.

| Mn   | Mw   | DPI  |
|------|------|------|
| 1426 | 1575 | 1.10 |

**Table S2.** Dispersion of diameters of fibers and Pd particles.

| Catalyst        | Pd/8% PAN-Tan | Pd/12% PAN-Tan | Pd/16% PAN-Tan | 16% PAN |
|-----------------|---------------|----------------|----------------|---------|
| Fiber diameters | 458 nm        | 81 nm          | 47 nm          | 9 nm    |
| particle sizes  | 2.52 nm       | 3.42 nm        | 2.86 nm        |         |

**Table S3.** Electrical conductivity of spinning solution.

| Spinning solution                                | 16% PAN | 16% PAN-Tan |
|--------------------------------------------------|---------|-------------|
| Specific conductance ( $\mu\text{S}/\text{cm}$ ) | 182.1   | 274.5       |

**Table S4.**  $T_{\text{onset}}$  and  $T_{\text{max}}$  of the fibers based on thermogravimetric analysis.

| Catalyst                | 16% PAN | 8% PAN-Tan | 12% PAN-Tan | 16% PAN-Tan |
|-------------------------|---------|------------|-------------|-------------|
| $T_{\text{onset}}$ (°C) | 286     | 288        | 290         | 284         |
| $T_{\text{max}}$ (°C)   | 293     | 297        | 296         | 292         |

**Table S5.** Catalyst recycling.

| Number of reuses | 1    | 2    | 3    | 4    | 5    |
|------------------|------|------|------|------|------|
| VAL yield (%)    | 97.3 | 96.9 | 97.8 | 96.1 | 98.1 |

**Table S6.** Adsorption of  $\text{Pd}^{2+}$  on the fibers.

| Catalyst            | 16% PAN | Pd/8% PAN-Tan | Pd/12% PAN-Tan | Pd/16% PAN-Tan |
|---------------------|---------|---------------|----------------|----------------|
| Adsorption rate (%) | 76.8    | 88.9          | 93.0           | 97.3           |

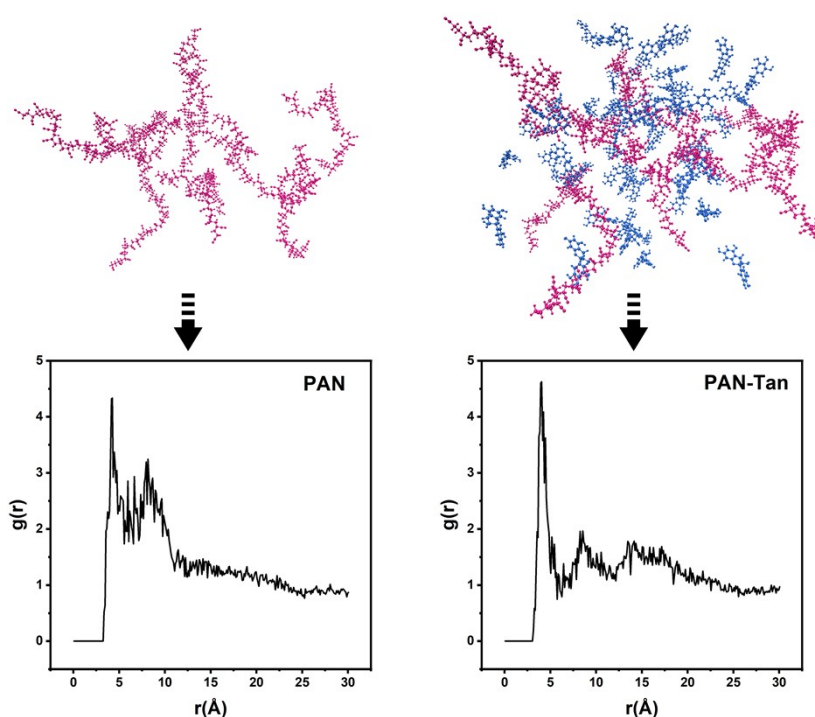**Figure S1.** Radical distribution functions in PAN in different systems.

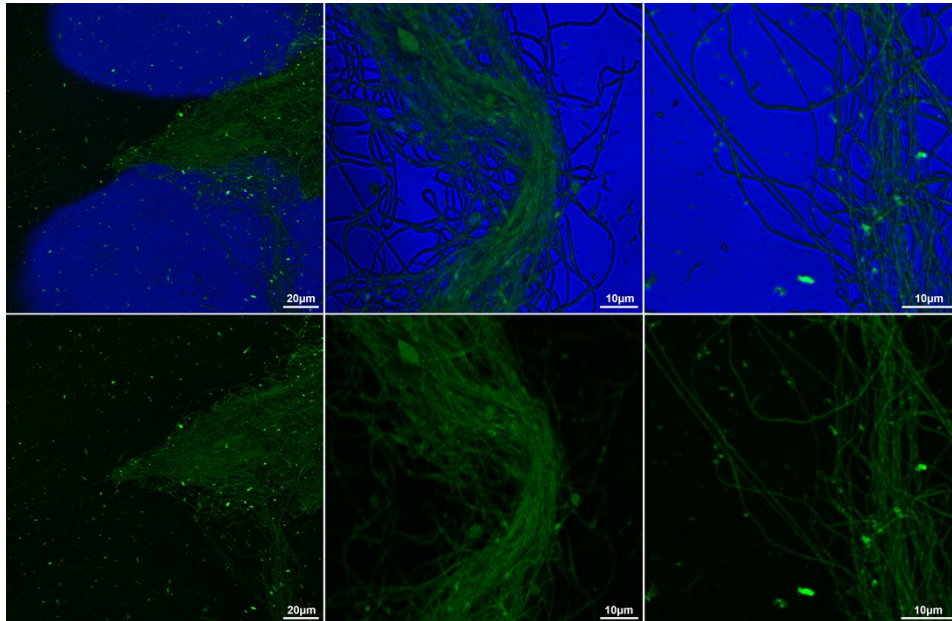

Figure S2. Fluorescence spectra of 8% PAN-Tan fibers.

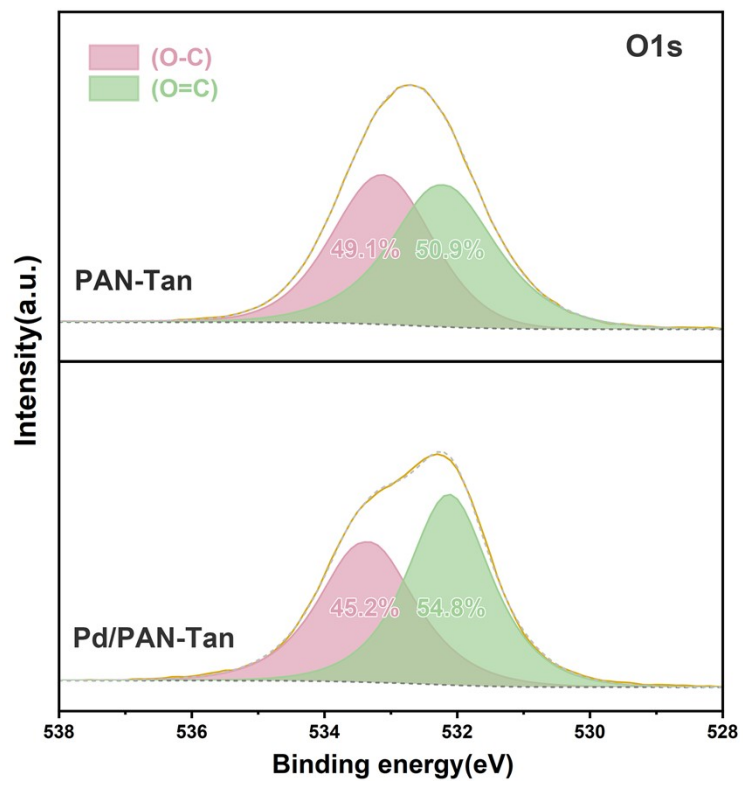

Figure S3. XPS O1s spectra of catalyst before and after Pd loading

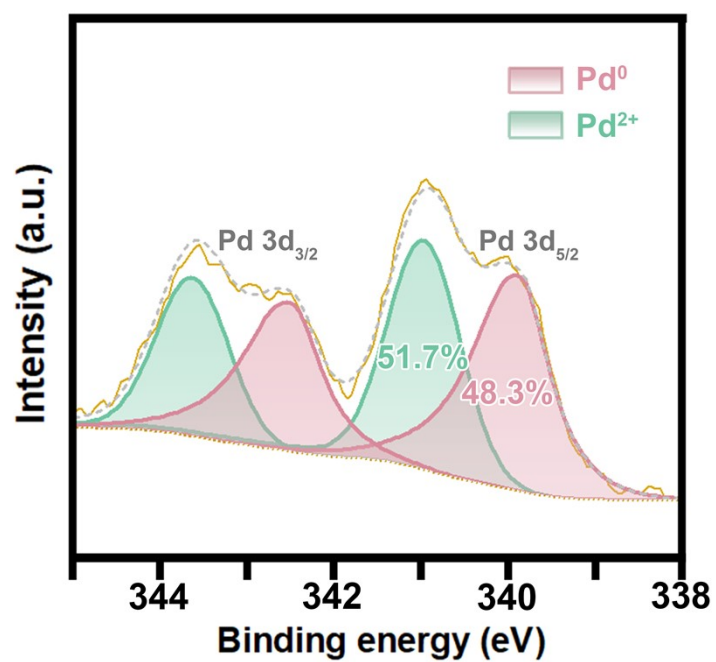

Figure S4. XPS pattern of the catalyst after the fixed bed reaction.

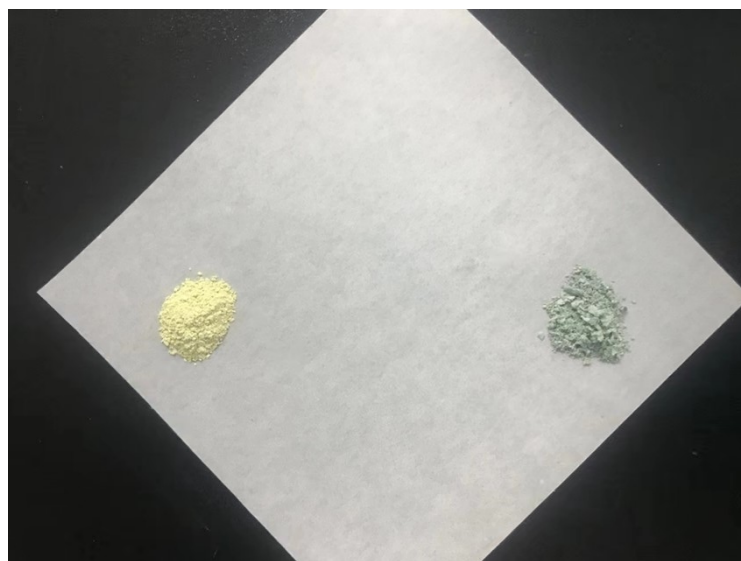

Figure S5. Diagram of catalyst before and after hydrogen overflow test.
